# Supplementary material for: Enhancers of amyloid aggregation: novel ferrocene-based compounds selective toward amyloid models
Source: Royal Society of Chemistry journal article supplement (doi:10.1039/d4qi01854k), 2024-01-01
Supplement: d4qi01854k1.pdf [file d4qi01854k1.pdf]

SUPPLEMENTARY INFORMATION

## Enhancers of amyloid aggregation: novel ferrocene-based compounds selective toward amyloid models

*Sara La Manna*<sup>a,\*</sup>, *Concetta Di Natale*<sup>b</sup>, *Valeria Panzetta*<sup>b,c</sup>, *Paolo Antonio Netti*<sup>b,c</sup>, *Antonello Merlino*<sup>d</sup>, *Konrad Kowalski*<sup>e</sup> and *Daniela Marasco*<sup>a,\*</sup>

<sup>a</sup>Department of Pharmacy, University of Naples “Federico II”, 80131, Naples, Italy.

<sup>b</sup>Department of Chemical, Materials, and Industrial Production Engineering (DICMaPI), University of Naples Federico II, 80125 Naples, Italy.

<sup>c</sup>Interdisciplinary Research Centre on Biomaterials (CRIB), University of Naples Federico II, Istituto Italiano di Tecnologia, 80125, Naples, Italy.

<sup>d</sup>Department of Chemical Sciences, University of Naples “Federico II”, 80126, Naples, Italy

<sup>e</sup>University of Łódź, Faculty of Chemistry, Department of Organic Chemistry, Tamka 12, 91-403 Łódź, Poland.

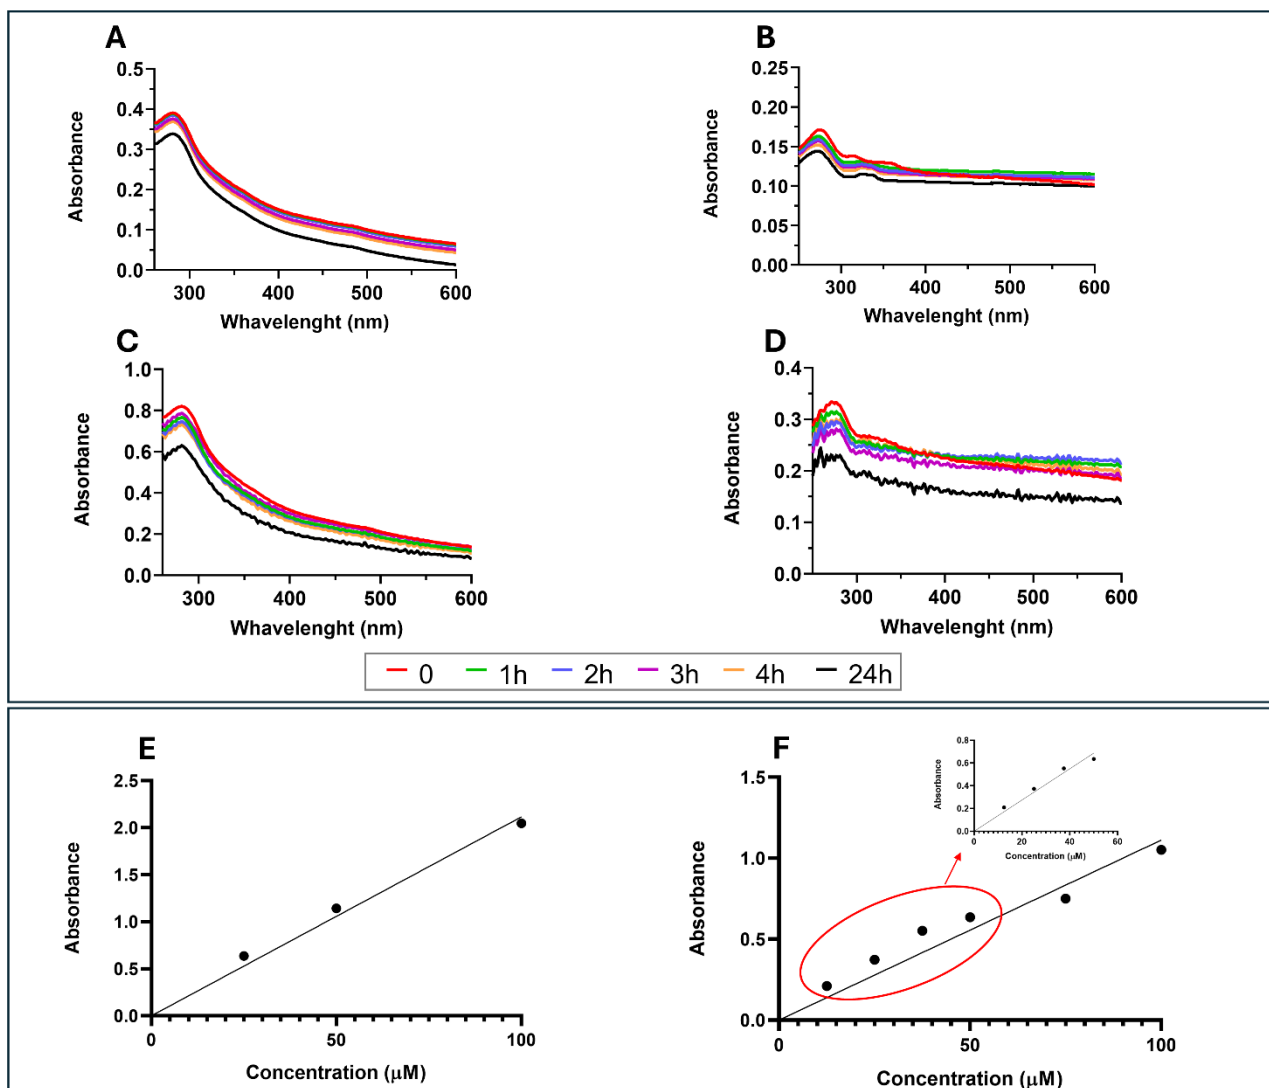

**Figure S1.** (Upper panel) UV-Vis spectra overtime of **mono-T\_Fc** (A, C) and **di-T\_Fc** (B, D): 25  $\mu\text{M}$  (A, B) and 75  $\mu\text{M}$  (C, D) in 10 mM phosphate buffer at pH 7.4 (0.2% DMSO, v/v). (Lower panel) Solubility assays of **mono-T\_Fc** (E) and **di-T\_Fc** (F) in 10 mM phosphate buffer at pH 7.4 (0.2% DMSO, v/v). As inset of panel F, magnification of the region from 0 to 60  $\mu\text{M}$ . The values shown in panels E and F are the average of two separate measurements.

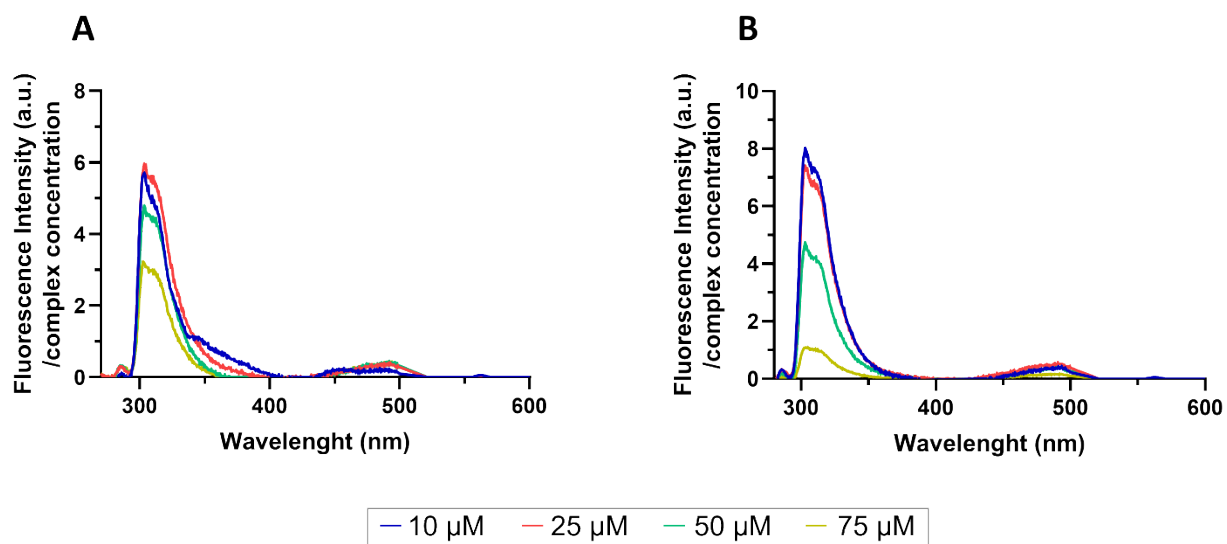

**Figure S2.** Overlay of fluorescence emission spectra normalized for complexes concentration, (A) **mono-T\_Fc** and (B) **di-T\_Fc**.

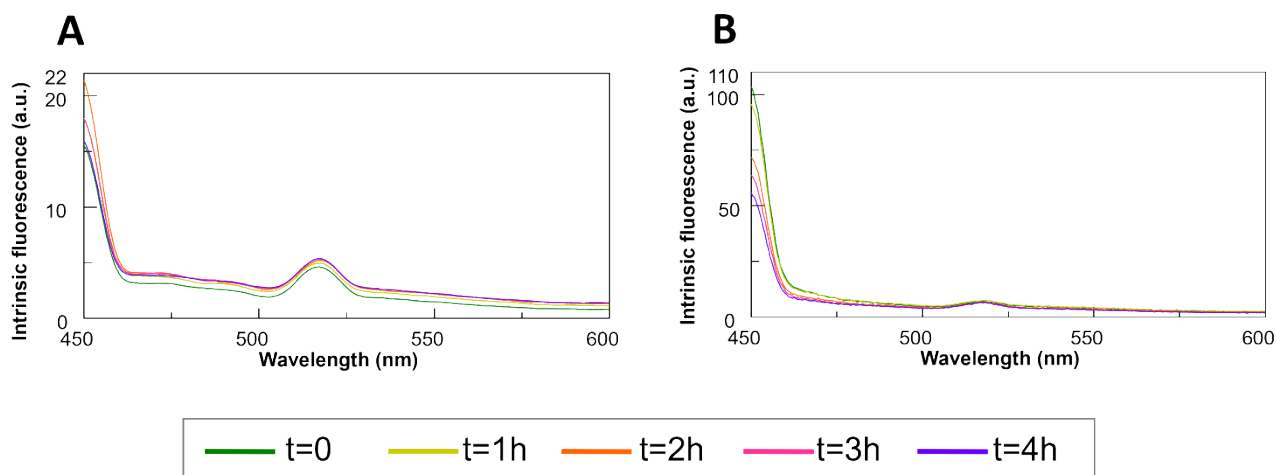

**Figure S3.** Overlay of fluorescence emission spectra of **mono-T<sub>2</sub>Fc** (A) and **di-T<sub>2</sub>Fc** (B) at 25 $\mu$ M ( $\lambda_{exc}$  = 440 nm).

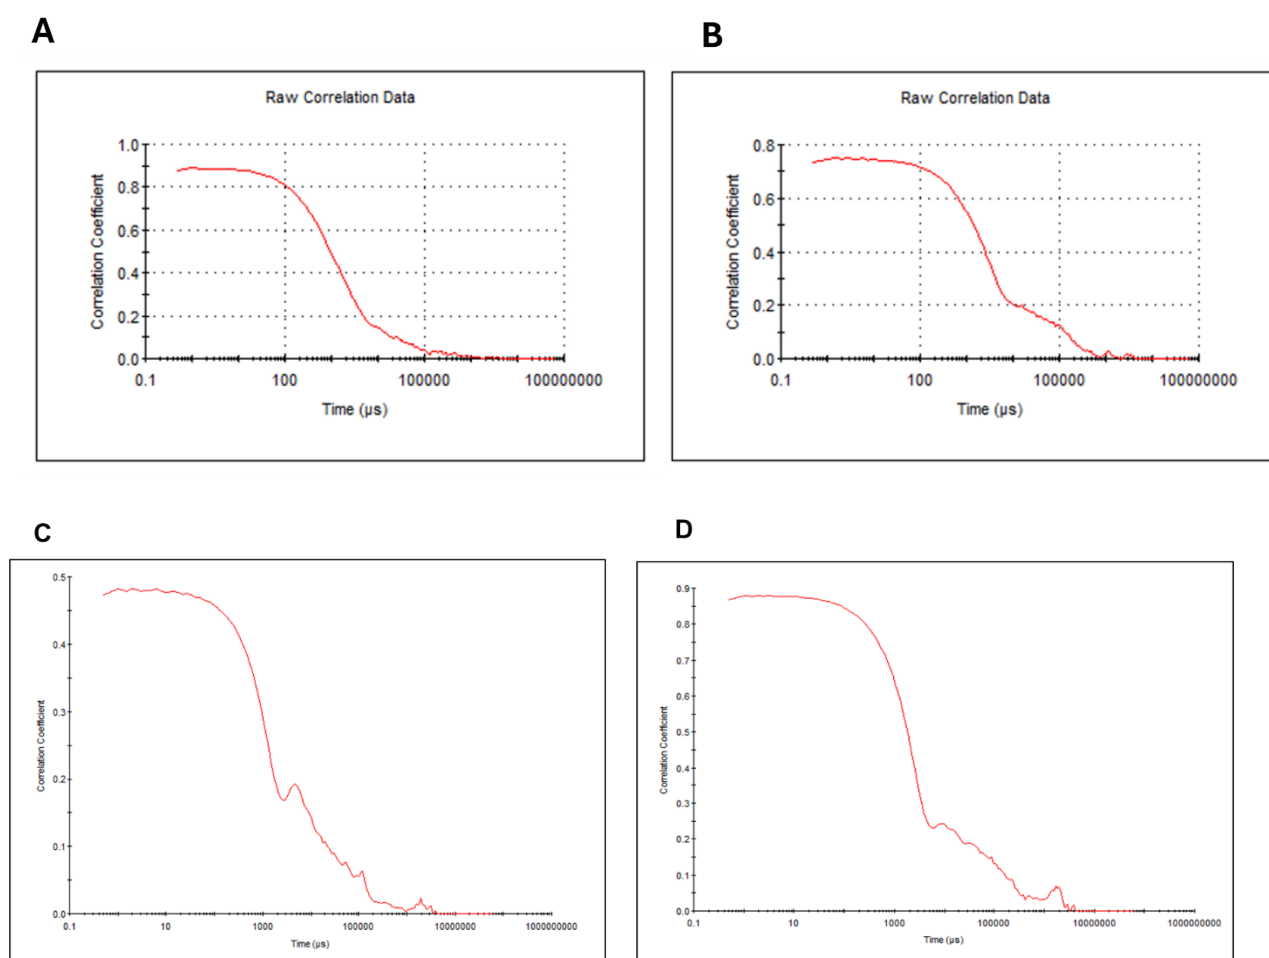

**Figure S4.** Raw correlation by DLS of: (A,C) A $\beta$ <sub>21-40</sub> alone and (B,D) with **mono-T<sub>2</sub>Fc** at 1:0.5 peptide:metal complex molar ratio, recorded after 4 (A-B) and 6 h (C-D) of aggregation.

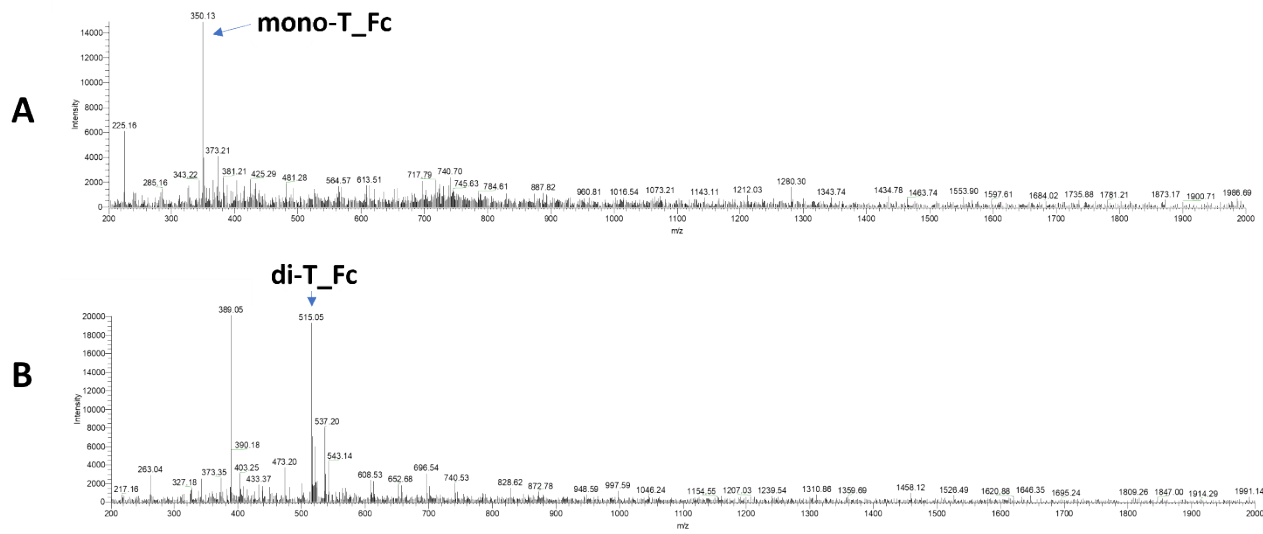

**Figure S5.** ESI-MS spectra of (A) mono-T\_Fc and (B) di-T\_Fc.

A

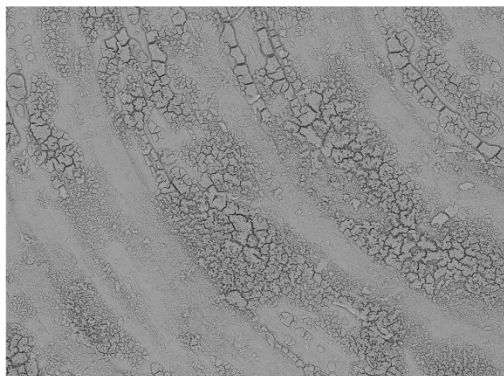

TM3000 2023/11/17 15:19 HL D8.2 x500 200 um  
DICMAPI - Test Misure

B

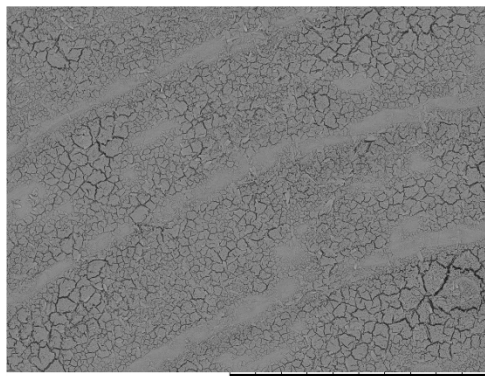

TM3000 2023/11/17 15:13 HL D8.1 x500 200 um  
DICMAPI - Test Misure

**Figure S6.** SEM micrographs images of (A) **mono-T\_Fc** and (B) **di-T\_Fc**.

Alone

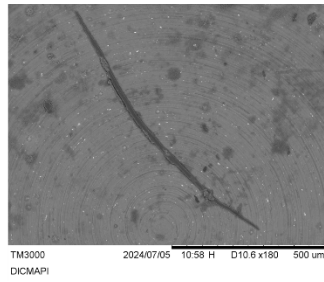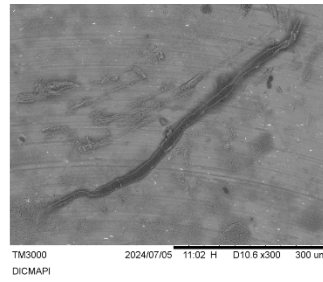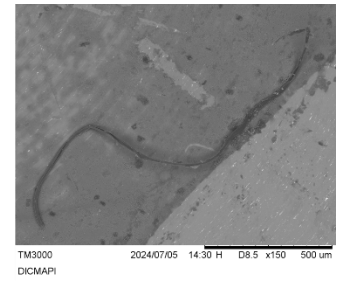

+ mono-T\_Fc

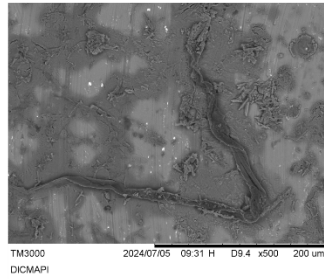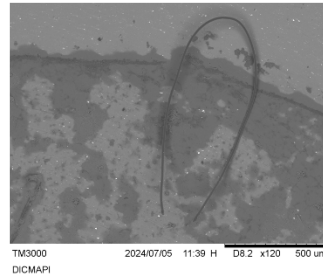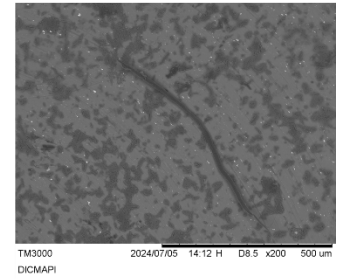

+ di-T\_Fc

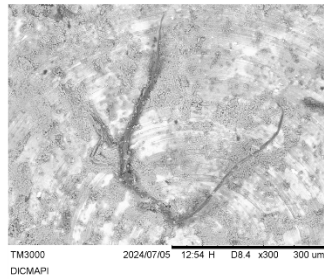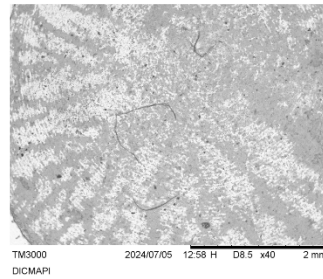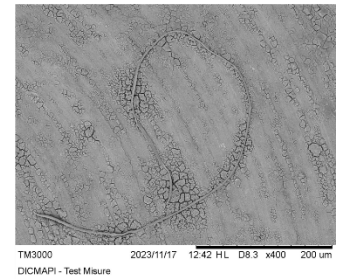

**Figure S7.** SEM micrographs images of  $A\beta_{21-40}$  in the absence and presence of **mono-T\_Fc** or **di-T\_Fc** at 1:0.5 peptide:metal complex molar ratio. For each sample, the three images are derived from 3 independent experiments.

Alone

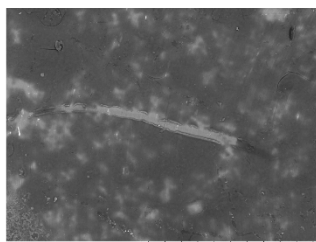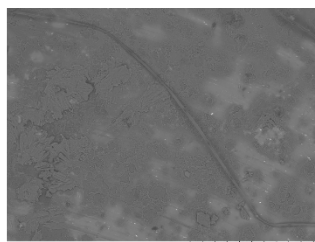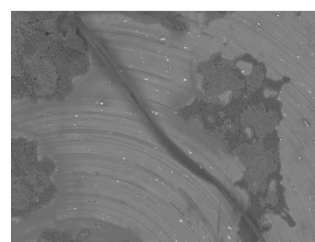

+ mono-T\_Fc

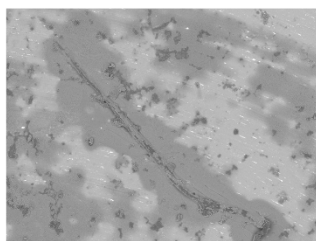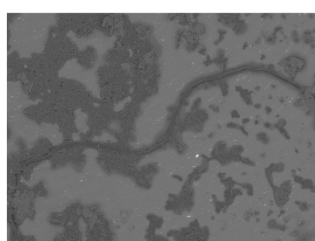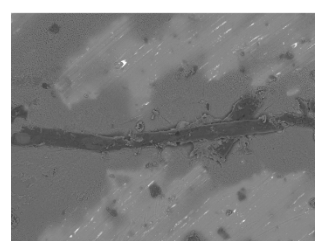

+ di-T\_Fc

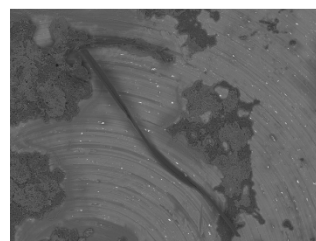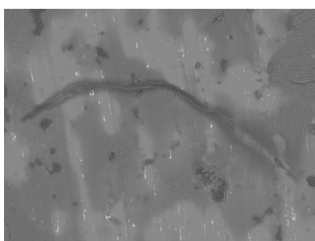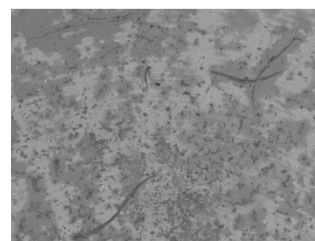

**Figure S8.** SEM micrographs images of NPM1<sub>264-277</sub> in the absence and presence of **mono-T\_Fc** or **di-T\_Fc** at 1:0.5 peptide:metal complex molar ratio. For each sample, the three images are derived from 3 independent experiments



**Table S1:** Time values at which ThT fluorescence emissions reach their maximum value/2 are named  $t_{1/2}$  and maxima intensity values related to ThT experiments.

|                                                  | Sample            | $t_{1/2}$ (Min) | Maximum Intensity (a.u.) |
|--------------------------------------------------|-------------------|-----------------|--------------------------|
| <b>NPM1<sub>264-277</sub></b>                    | Alone             | 8.20            | 3682.0                   |
|                                                  | + mono-T_Fc 1:1.5 | 8.37            | 2461.0                   |
|                                                  | + mono-T_Fc 1:1   | 8.80            | 2434.0                   |
|                                                  | + mono-T_Fc 1:0.5 | 8.50            | 2203.0                   |
|                                                  | + mono-T_Fc 1:0.2 | 8.30            | 3321.0                   |
|                                                  | + di-T_Fc 1:1.5   | 7.80            | 2302.0                   |
|                                                  | + di-T_Fc 1:1     | 8.40            | 2545.5                   |
|                                                  | + di-T_Fc 1:0.5   | 14.5            | 2145.0                   |
|                                                  | + di-T_Fc 1:0.2   | 12.0            | 3818.5                   |
| <b>A<math>\beta</math><sub>21-40</sub></b>       | Alone             | 188.6           | 559.5                    |
|                                                  | + mono-T_Fc 1:1.5 | 219.5           | 719.1                    |
|                                                  | + mono-T_Fc 1:1   | 220.3           | 770.5                    |
|                                                  | + mono-T_Fc 1:0.5 | 221.5           | 892.5                    |
|                                                  | + mono-T_Fc 1:0.2 | 235.0           | 580.0                    |
|                                                  | + di-T_Fc 1:1.5   | 210.3           | 1278.6                   |
|                                                  | + di-T_Fc 1:1     | 262.0           | 2342.5                   |
|                                                  | + di-T_Fc 1:0.5   | 268.4           | 3768.7                   |
|                                                  | + di-T_Fc 1:0.2   | 205.9           | 889.2                    |
| <b>ASA (A<math>\beta</math><sub>21-40</sub>)</b> | +Seed mono-T_Fc   | 172.3           | 3043.0                   |
|                                                  | +Seed di-T_Fc     | 145.2           | 948.4                    |

**Table S2:** Table of main observed ions relative to the species formed by the A $\beta_{21-40}$  alone and mixed with **mono-T\_Fc** or **di-T\_Fc**. Experimental and theoretical mass and charge were reported for each adduct.

| Description                          | m/z (charge)                         |                             | Theoretical m/z             |                             |
|--------------------------------------|--------------------------------------|-----------------------------|-----------------------------|-----------------------------|
|                                      | Peptide                              | +metal complex              |                             |                             |
| A $\beta_{21-40}$ : <b>mono-T_Fc</b> | A $\beta_{21-40}$                    | 1887.08 (+1)<br>943.97 (+2) | 1887.08 (+1)<br>943.86 (+2) | 1887.22<br>944.11           |
|                                      | b <sub>16</sub>                      | 1556.73 (+1)                | 1555.59 (+1)                | 1555.81                     |
|                                      | b <sub>15</sub>                      | 1456.61 (+1)                | 1457.90 (+1)                | 1456.75                     |
|                                      | b <sub>14</sub>                      | 1325.86 (+1)                | 1325.77 (+1)                | 1325.71                     |
|                                      | b <sub>12</sub>                      | 1156.63 (+1)                | 1155.61 (+1)                | 1155.60                     |
|                                      | A $\beta_{21-40}$ + <b>mono-T_Fc</b> | -                           | 1118.68 (+2)<br>746.7 (+3)  | 1119.19 (+2)<br>746.46 (+3) |
|                                      | A $\beta_{21-40}$ : <b>di-T_Fc</b>   | A $\beta_{21-40}$           | 1887.08 (+1)<br>943.97 (+2) | 1887.08 (+1)<br>943.89 (+2) |
| b <sub>16</sub>                      |                                      | 1556.73 (+1)                | -                           | 1555.81                     |
| b <sub>15</sub>                      |                                      | 1456.61 (+1)                | 1457.86 (+1)                | 1456.75                     |
| b <sub>14</sub>                      |                                      | 1325.86 (+1)                | 1325.83 (+1)                | 1325.71                     |
| b <sub>12</sub>                      |                                      | 1156.63 (+1)                | -                           | 1155.60                     |
| A $\beta_{21-40}$ + <b>di-T_Fc</b>   |                                      | -                           | 1201.17 (+2)                | 1201.27                     |

**Table S3:** Table of main observed ions relative to the species formed by the NPM1<sub>264-277</sub> peptide alone and mixed with **mono-T\_Fc** or **di-T\_Fc**. Experimental and theoretical mass and charge were reported for each adduct.

|                                               | Description                                | m/z (charge) |                | Theoretical m/z |
|-----------------------------------------------|--------------------------------------------|--------------|----------------|-----------------|
|                                               |                                            | peptide      | +metal complex |                 |
| NPM1 <sub>264-277</sub> :<br><b>mono-T_Fc</b> | NPM1 <sub>264-277</sub> Covalent dimer     | 591.76 (+6)  | 591.74 (+6)    | 591.30          |
|                                               | NPM1 <sub>264-277</sub> Covalent dimer     | 886.85 (+4)  | 886.81 (+4)    | 886.45          |
|                                               | NPM1 <sub>264-277</sub> Covalent dimer     | 1181.50 (+3) | 1181.54 (+3)   | 1180.93         |
|                                               | NPM1 <sub>264-277</sub> Covalent dimer     | 1772.97 (+2) | 1771.96 (+2)   | 1771.9          |
|                                               | NPM1 <sub>264-277</sub> + <b>mono-T_Fc</b> | -            | 1060.95 (+2)   | 1061.45         |
| NPM1 <sub>264-277</sub> :<br><b>di-T_Fc</b>   | NPM1 <sub>264-277</sub> Covalent dimer     | 591.75 (+6)  | 591.74 (+6)    | 591.30          |
|                                               | NPM1 <sub>264-277</sub> Covalent dimer     | 886.85 (+4)  | 886.83 (+4)    | 886.45          |
|                                               | NPM1 <sub>264-277</sub> Covalent dimer     | 1181.50 (+3) | 1181.57 (+3)   | 1180.93         |
|                                               | NPM1 <sub>264-277</sub> Covalent dimer     | 1772.9 (+2)  | 1771.97 (+2)   | 1771.9          |
|                                               | NPM1 <sub>264-277</sub> + <b>di-T_Fc</b>   | -            | 1143.39 (+2)   | 1143.95         |
